# Supplementary material for: Human papillomavirus genotyping by Linear Array and Next-Generation Sequencing in cervical samples from Western Mexico
Source: Springer Nature journal article supplement (doi:10.1186/s12985-015-0391-4), 2015-10-06
Supplement: MOESM1 [file 9770372]

| WCL                                 | CIN I |                    | CC |    |                    |
|-------------------------------------|-------|--------------------|----|----|--------------------|
| SI and MI                           | SI    | MI                 | SI | MI |                    |
| <b>HPV genotypes detected by LA</b> |       |                    |    |    |                    |
| 16                                  | 45    | 84, 89, 16         | 16 | 35 | 16, 18, 52         |
| 59                                  | 31    | 59, 62             | 16 | 16 | 16, 18             |
| 68, 81, 84                          | 54    | 71, 33             | 18 | 16 | 31, 54, 71, 83, 89 |
| 51                                  | 16    | 58, 66, 89         | 16 | 33 | 16, 59             |
| 6, 11, 16, 59, 84                   | 62    | 31, 56, 66, 82, 84 | 18 | 18 | 18, 42             |
| 51, 52, 56, 66                      | 67    | 6, 53, 61, 84, 89  | 66 | 18 | 39, 68             |
| 56, 66                              | 89    | 31, 39             | 16 | 16 | 45, 72             |
| 31, 51, 59                          | 33    | 16, 53, 62         | 16 | 16 | 39, 68             |
| 84                                  | 66    | 62, 89             | 31 | 16 | 16, 31             |
| 39                                  | 84    | 16, 84             | 16 | 51 | 16, 62             |
| 89                                  | 42    | 16, 42             | 18 | 18 | 16, 18, 62         |
| 16                                  | 6     | 35, 84             | 45 | 16 | 16, 54, 62, 70     |
|                                     | 16    | 73, 83             | 45 | 16 | 52, 53, 66, 68     |
|                                     | 59    | 61, 84             | 33 | 45 | 45, 84             |
|                                     | 53    | 16, 18, 31, 33, 58 | 16 | 16 | 52, 53, 68         |
|                                     | 84    | 52, 61             | 16 | 16 | 16, 52             |
|                                     | 53    | 56, 66, 89         | 45 | 18 | 16, 18             |
|                                     | 16    | 16, 52, 82, 84     | 45 | 16 | 6, 39              |
|                                     | 61    | 82, 84             | 71 | 18 | 16, 52             |
|                                     | 54    | 16, 18, 73         | 59 | 16 | 39, 62, 71         |
|                                     | 39    | 16, 31, 53, 62     | 16 | 16 | 16, 52             |
|                                     | 89    | 16, 42             | 18 | 39 | 69, 71, 81, 84     |
|                                     | 16    | 16, 64             | 16 | 16 | 39, 68             |
|                                     | 16    | 16, 39, 52, 84, 89 | 16 | 45 | 18, 26             |
|                                     | 89    | 56, 73             | 33 | 16 | 31, 53, 61         |
|                                     | 84    | 31, 73             | 16 | 16 | 39, 71             |
|                                     | 53    | 16, 58             | 45 | 16 | 31, 53, 61         |
|                                     | 51    | 54, 55, 61, 83, 89 | 18 | 31 | 39, 71             |
|                                     | 58    | 16, 51, 56         | 16 | 16 |                    |
|                                     | 53    | 6, 16, 56          |    | 16 |                    |
|                                     | 39    |                    |    |    |                    |
|                                     | 39    |                    |    |    |                    |
|                                     | 59    |                    |    |    |                    |
|                                     | 83    |                    |    |    |                    |
|                                     | 16    |                    |    |    |                    |
|                                     | 51    |                    |    |    |                    |
|                                     | 58    |                    |    |    |                    |
